# Supplementary material
Source: publisher site journal article supplement (https://www.dovepress.com/article/supplementary_file/613894/613894%20Revised%20Supplemental%20Tables.docx)
Supplement: Supplementary file 1 [file 613894%20Revised%20Supplemental%20Tables.docx]

**Supplemental Table 1.** One-Way ANOVA statistical analysis for Axial Displacement, Compression Force, Optic Decentration, and Optic Tilt measured at 10-mm Compression Diameter

|  | **P Value** | | | |
| --- | --- | --- | --- | --- |
|  | **Displacement** | **Force** | **Decentration** | **Tilt** |
| Clareon Monofocal vs Clareon PanOptix | > 0.999 | > 0.999 | 0.260 | > 0.999 |
| Clareon Monofocal vs Clareon Vivity | > 0.999 | > 0.999 | 0.999 | > 0.999 |
| Clareon PanOptix vs Clareon Vivity | 0.994 | > 0.999 | 0.877 | 0.997 |
| CT Lucia 621P vs  Clareon Monofocal | < 0.001 | < 0.001 | 0.542 | 0.997 |
| RayOne EMV vs  Clareon Monofocal | 0.981 | < 0.001 | 0.999 | 0.978 |
| ISOPURE 123 vs  Clareon Monofocal | < 0.001 | < 0.001 | 0.998 | > 0.999 |
| Vivinex Impress vs  Clareon Monofocal | > 0.999 | 0.998 | > 0.999 | 0.685 |
| enVista MX60E vs  Clareon Monofocal | < 0.001 | < 0.001 | 0.878 | > 0.999 |
| FineVision Trifocal vs  Clareon PanOptix | < 0.001 | < 0.001 | 0.237 | > 0.999 |

**Supplemental Table 2.** One-Way ANOVA statistical analysis for Axial Displacement, Compression Force, Optic Decentration, and Optic Tilt measured at 9-mm Compression Diameter

|  | **P Value** | | | |
| --- | --- | --- | --- | --- |
|  | **Displacement** | **Force** | **Decentration** | **Tilt** |
| Clareon Monofocal vs Clareon PanOptix | > 0.999 | > 0.999 | 0.985 | 0.964 |
| Clareon Monofocal vs Clareon Vivity | > 0.999 | > 0.999 | 0.966 | 0.969 |
| Clareon PanOptix vs Clareon Vivity | > 0.999 | 0.270 | 0.687 | > 0.999 |
| CT Lucia 621P vs  Clareon Monofocal | < 0.001 | 0.029 | 0.983 | > 0.999 |
| RayOne EMV vs  Clareon Monofocal | < 0.001 | < 0.001 | 0.999 | 0.952 |
| ISOPURE 123 vs  Clareon Monofocal | < 0.001 | < 0.001 | > 0.999 | 0.980 |
| Vivinex Impress vs  Clareon Monofocal | < 0.001 | 0.953 | 0.957 | 0.879 |
| enVista MX60E vs  Clareon Monofocal | < 0.001 | 0.029 | 0.997 | 0.693 |
| FineVision Trifocal vs  Clareon PanOptix | < 0.001 | < 0.001 | 0.260 | > 0.999 |

**Supplemental Table 3.** Statistical post-hoc tests used for Axial Displacement, Compression Force, Optic Decentration, and Optic Tilt analysis.

|  | **9-mm Compression Results** | **10-mm Compression Results** |
| --- | --- | --- |
| **Axial Displacement** | Games–Howell | Dunnet |
| **Optic Decentration** | Games–Howell | Games–Howell |
| **Optic Tilt** | Games–Howell | Games–Howell |
| **Compression Force** | Games–Howell | Games–Howell |

When homogeneity of variances was violated (Levene’s test, p < 0.05), Games–Howell post-hoc comparisons were applied. In cases where homogeneity of variances was confirmed (Levene’s test, p > 0.05), then Dunnett’s post-hoc test was used for comparisons. In the case where multiple comparisons test violated variance homogeneity (p < 0.05), but Levene’s test showed p > 0.05, results were treated with the Games–Howell analysis method. This is the statistically sound recommendation by Minitab for analysis.
